# Supplementary material
Source: PubMed Central journal article supplement (PMC6467799)
Supplement: NIHMS1009265-supplement-1.pdf [file NIHMS1009265-supplement-1.pdf]

## Supporting Information

### **An Efficient Method for Labeling Single Domain Antibody Fragments with $^{18}\text{F}$ Using Tetrazine-*Trans*-Cyclooctene Ligation and a Renal Brush Border Enzyme-Cleavable Linker**

Zhengyuan Zhou<sup>a</sup>, Nick Devoogdt<sup>b</sup>, Michael R. Zalutsky<sup>a</sup>, and Ganesan Vaidyanathan<sup>a,\*</sup>

<sup>a</sup>Department of Radiology, Duke University Medical Center, Durham, North Carolina, USA 27710

<sup>b</sup>In vivo Cellular and Molecular Imaging laboratory, Vrije Universiteit Brussel, (VUB), 1090, Brussels, Belgium

\*Corresponding Author: Ganesan Vaidyanathan, Ph.D., 161C, Bryan Research Building, 311 Research Drive, Durham, North Carolina 27710, USA. Tel.: (919) 684-7811; email address: [ganesan.v@duke.edu](mailto:ganesan.v@duke.edu)

## Table of Contents

Figure S1: MALDI TOF mass spectrum of TCO-GK-PEG<sub>4</sub> derivatized 2Rs15d sdAb – Page 2

Figure S2. MALDI TOF mass spectrum of TCO-PEG<sub>4</sub> derivatized 2Rs15d sdAb - Page 3

Figure S3. MALDI TOF mass spectrum of TCO-GK-PEG<sub>4</sub> derivatized R3B23 sdAb - Page 4

Figure S4. <sup>1</sup>H NMR spectra of compound **3** - Page 5

Figure S5. <sup>13</sup>C NMR spectra of compound **3** - Page 6

Figure S6. <sup>1</sup>H NMR spectra of compound **4** - Page 7

Figure S7. <sup>13</sup>C NMR spectra of compound **4** - Page 8

Figure S8. <sup>1</sup>H NMR spectra of compound **5** - Page 9

Figure S9. <sup>13</sup>C NMR spectra of compound **5** - Page 10

Figure S10. <sup>1</sup>H NMR spectra of compound **6** - Page 11

Figure S11. <sup>13</sup>C NMR spectra of compound **6** - Page 12

Figure S12. <sup>1</sup>H NMR spectra of compound **7** - Page 13

Figure S13. <sup>13</sup>C NMR spectra of compound **7** - Page 14

Figure S14. <sup>1</sup>H NMR spectra of compound **10** - Page 15

Figure S15. <sup>13</sup>C NMR spectra of compound **10** - Page 16

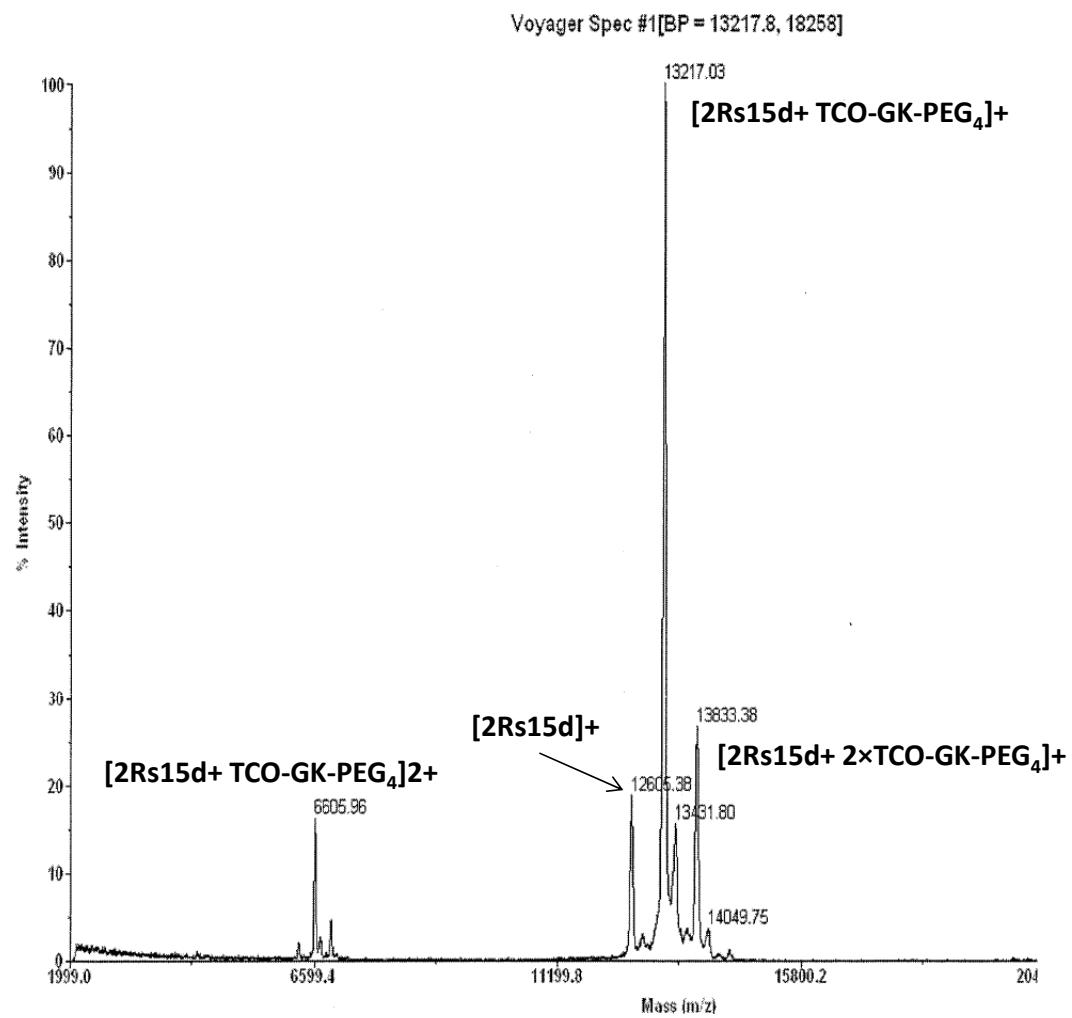

Figure S1. MALDI TOF mass spectrum of TCO-GK-PEG<sub>4</sub> derivatized 2Rs15d sdAbs

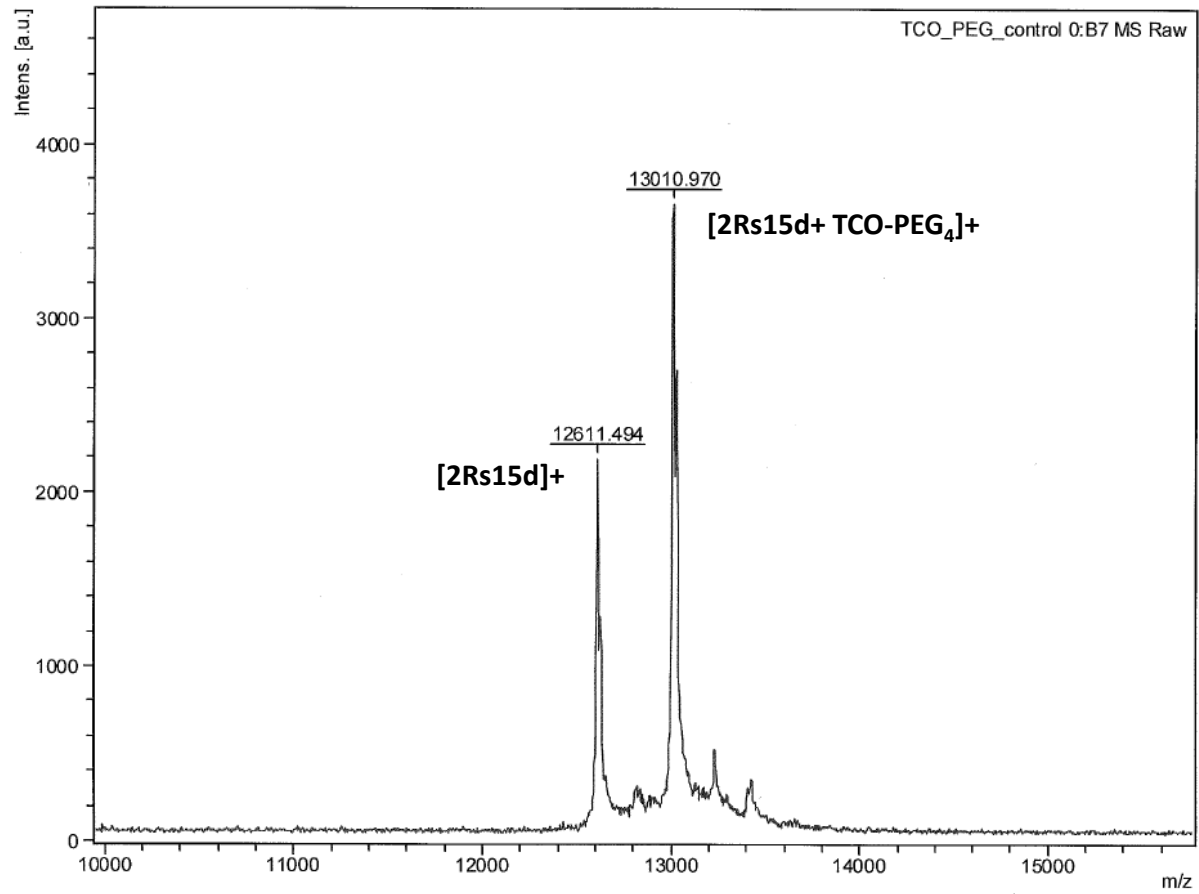

Figure S2. MALDI TOF mass spectrum of TCO-PEG<sub>4</sub> derivatized 2Rs15d sdAbs

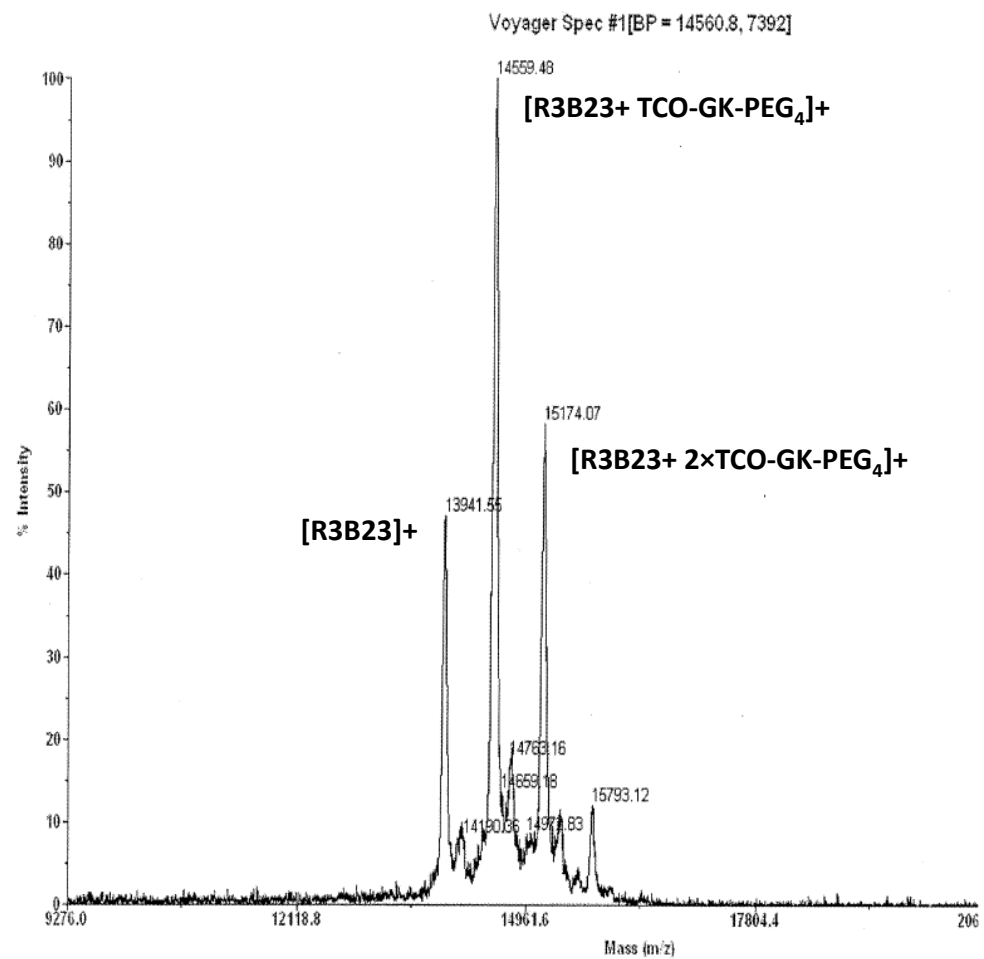

Figure S3. MALDI TOF mass spectrum of TCO-GK-PEG<sub>4</sub> derivatized R3B23 sdAbs

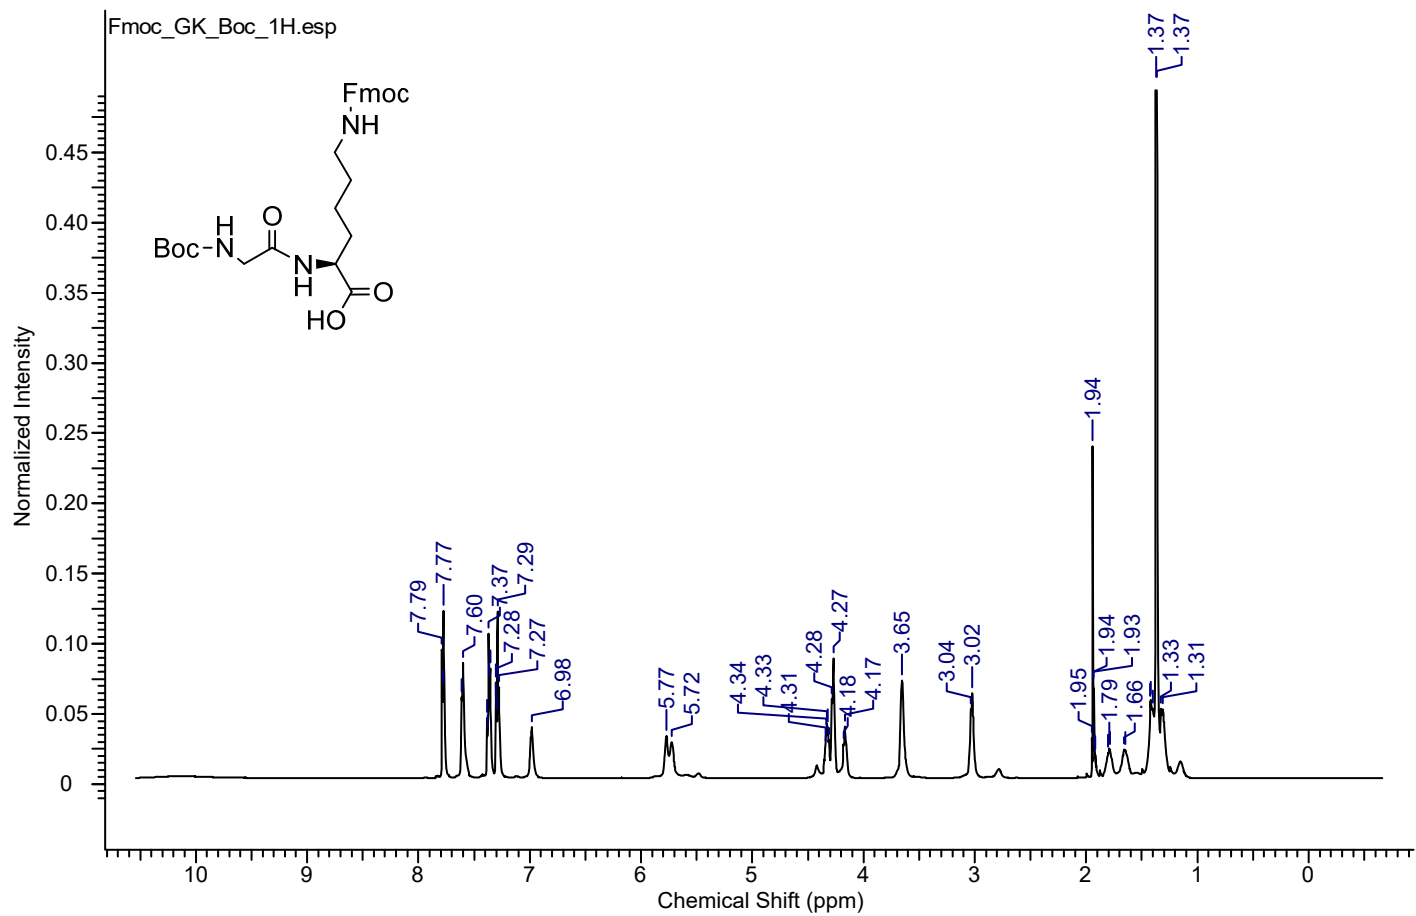

Figure S4.  $^1\text{H}$  NMR spectra of compound **3**

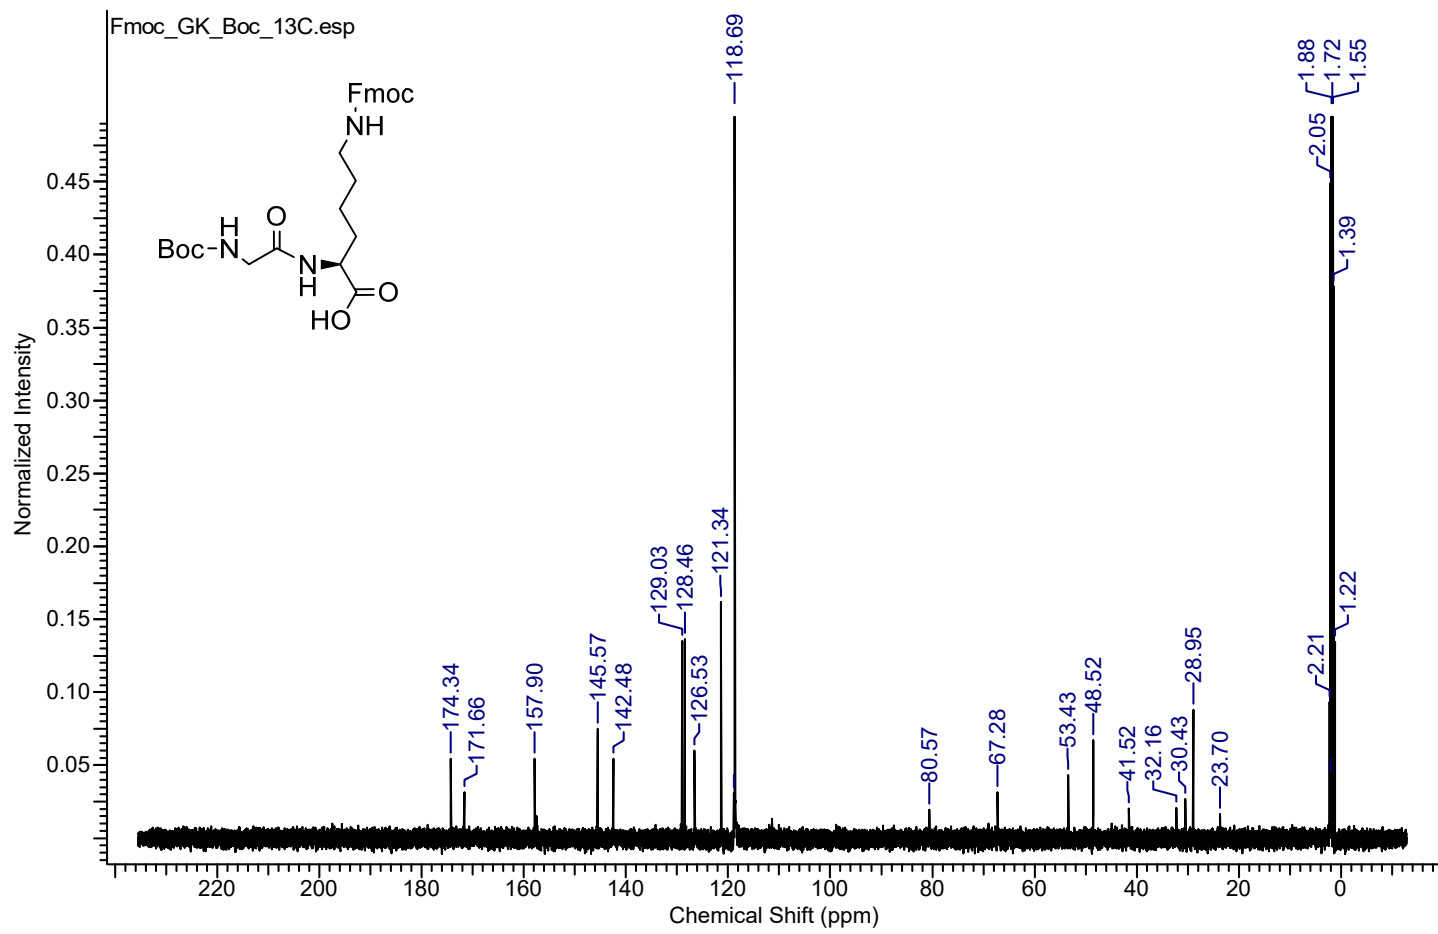

Figure S5.  $^{13}\text{C}$  NMR spectra of compound **3**

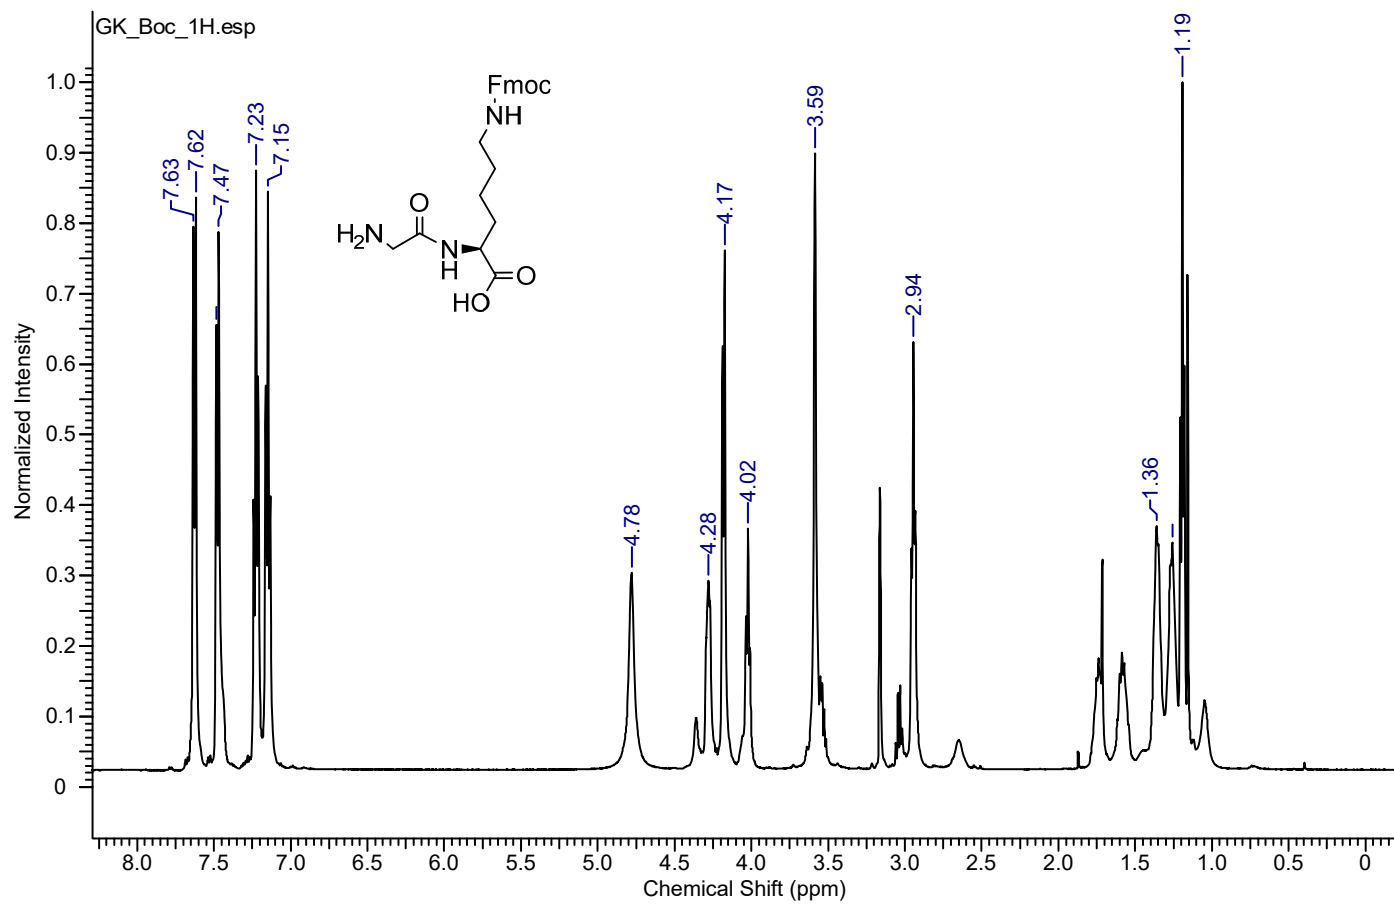

Figure S6. <sup>1</sup>H NMR spectra of compound **4**



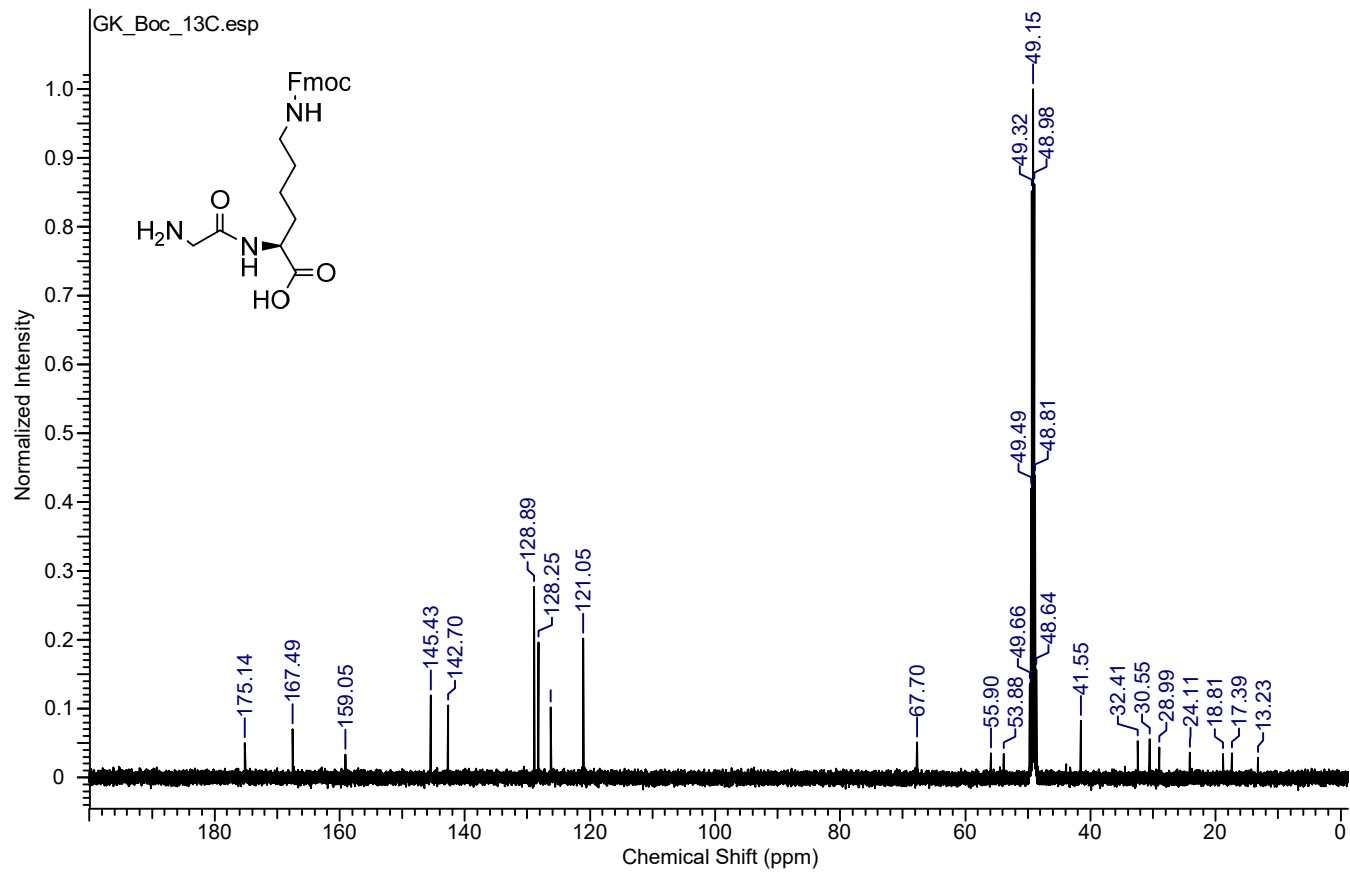

Figure S7.  $^{13}\text{C}$  NMR spectra of compound 4

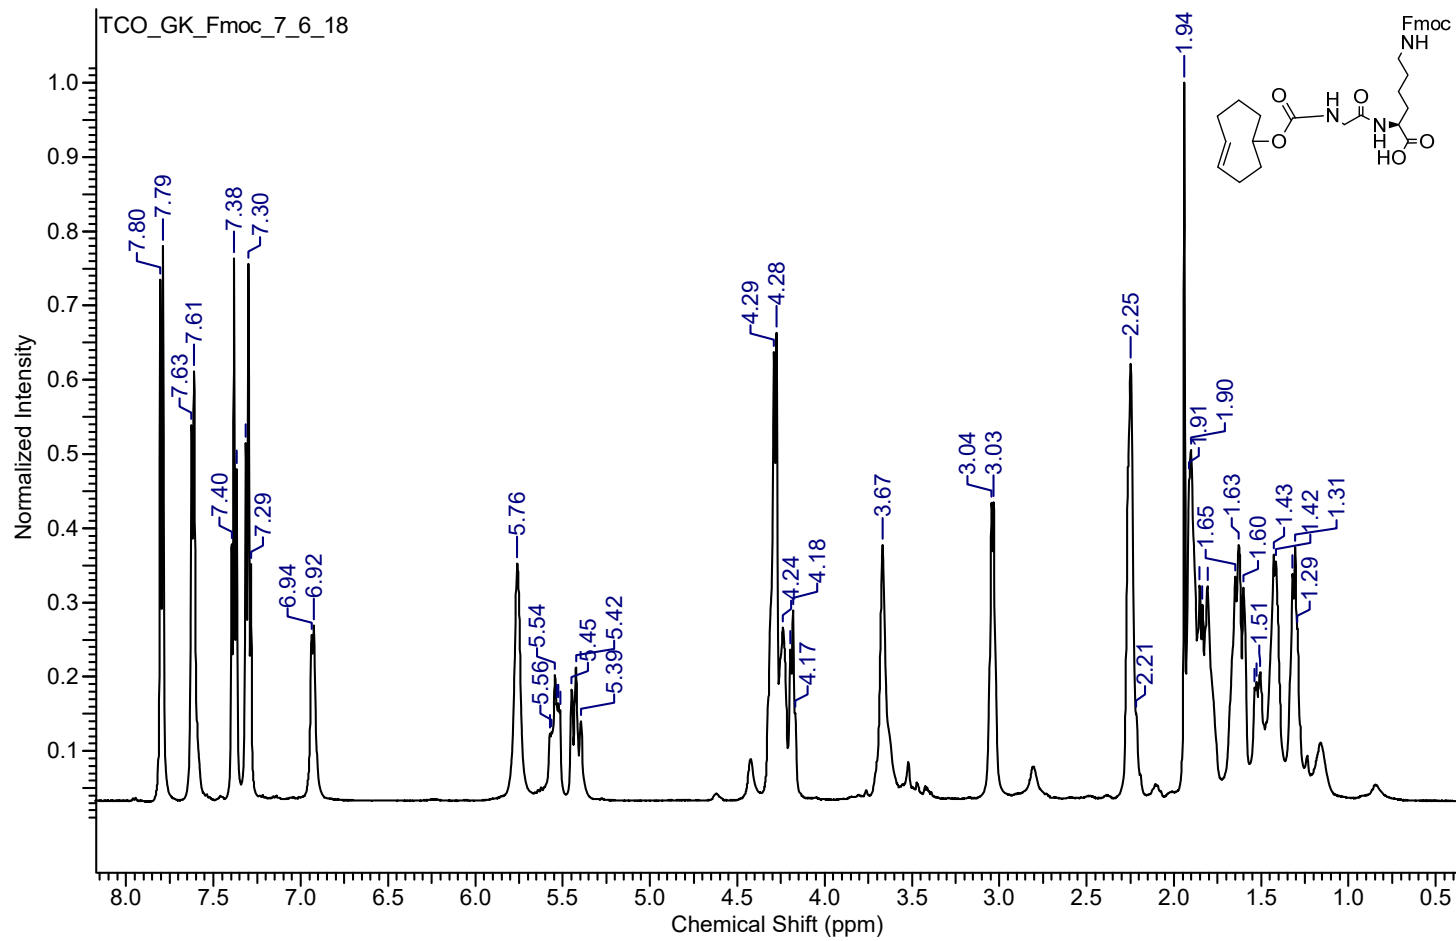

Figure S8.  $^1\text{H}$  NMR spectra of compound 5

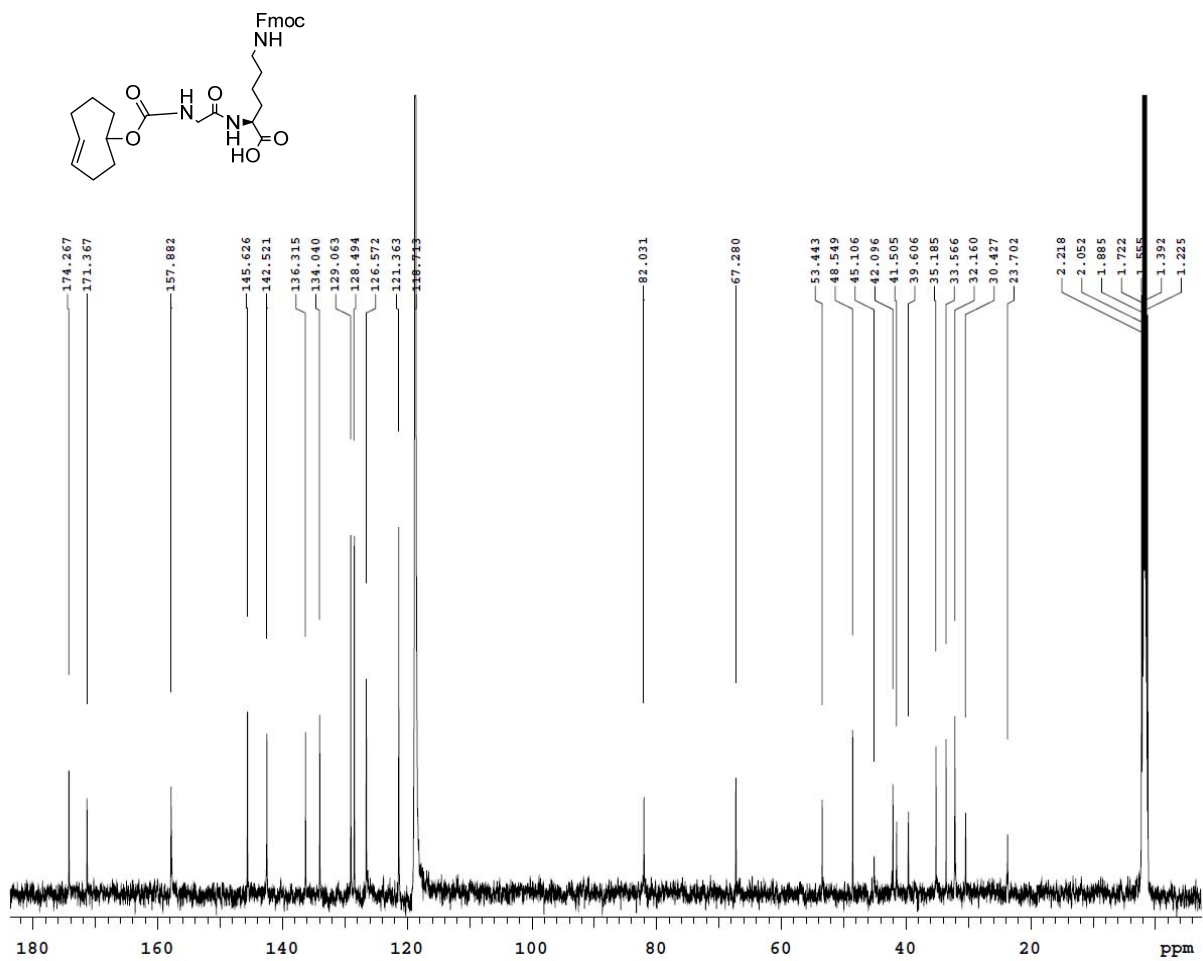

Figure S9. <sup>13</sup>C NMR spectra of compound 5

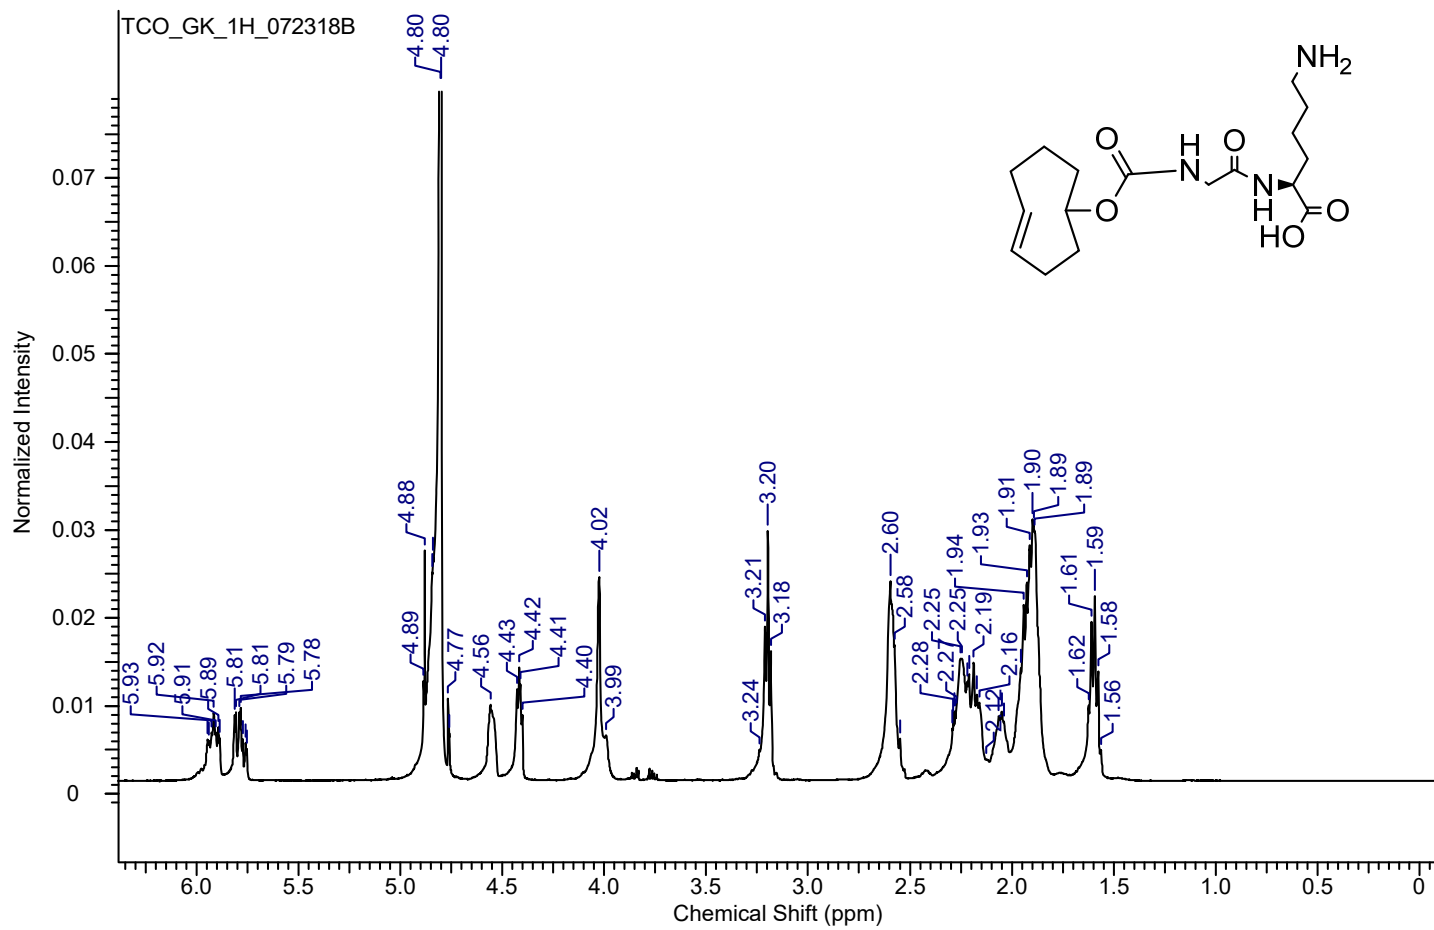

Figure S10. <sup>1</sup>H NMR spectra of compound 6

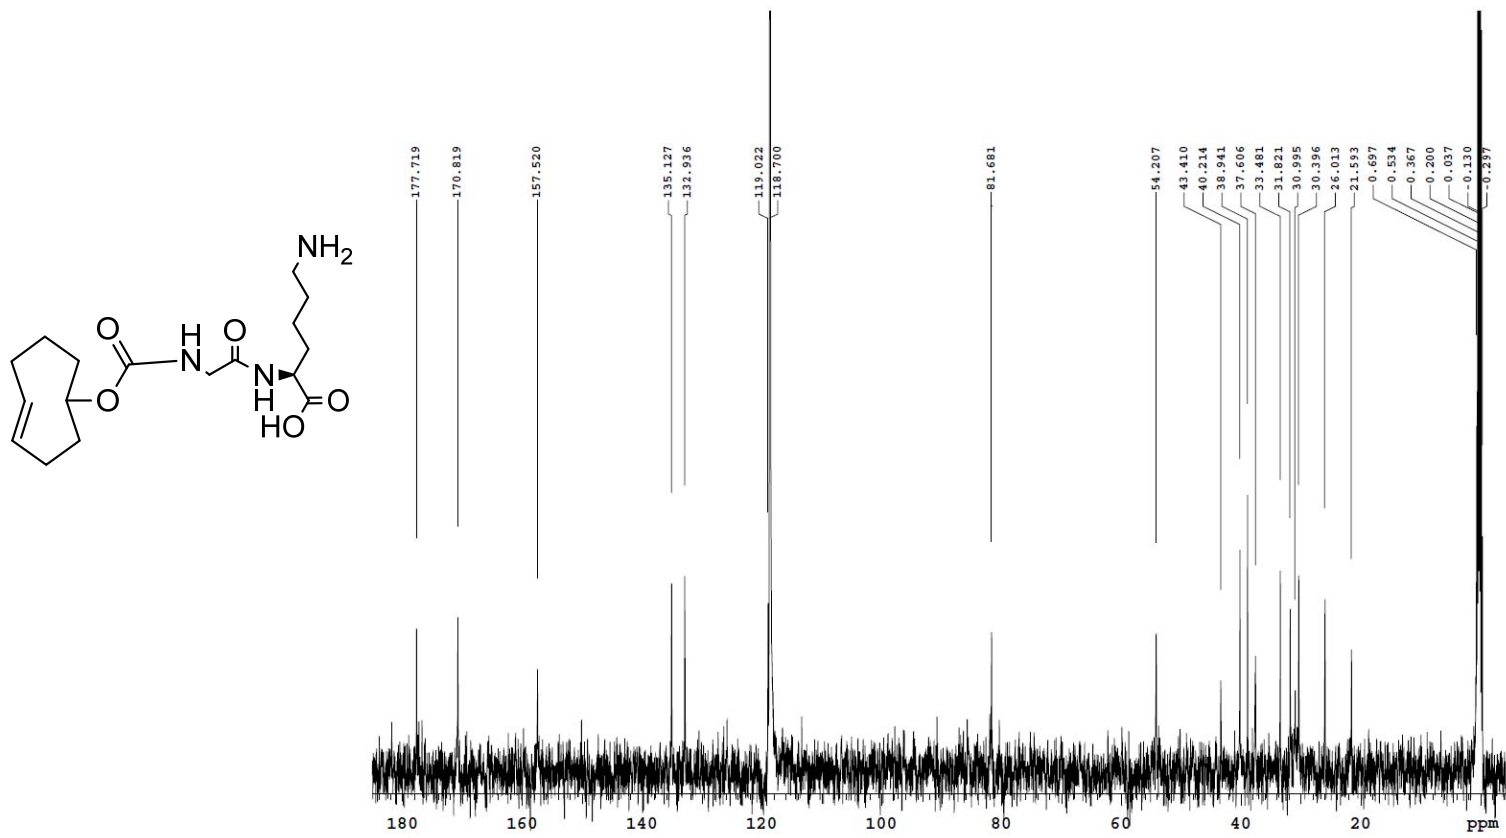

Figure S11. <sup>13</sup>C NMR spectra of compound 6

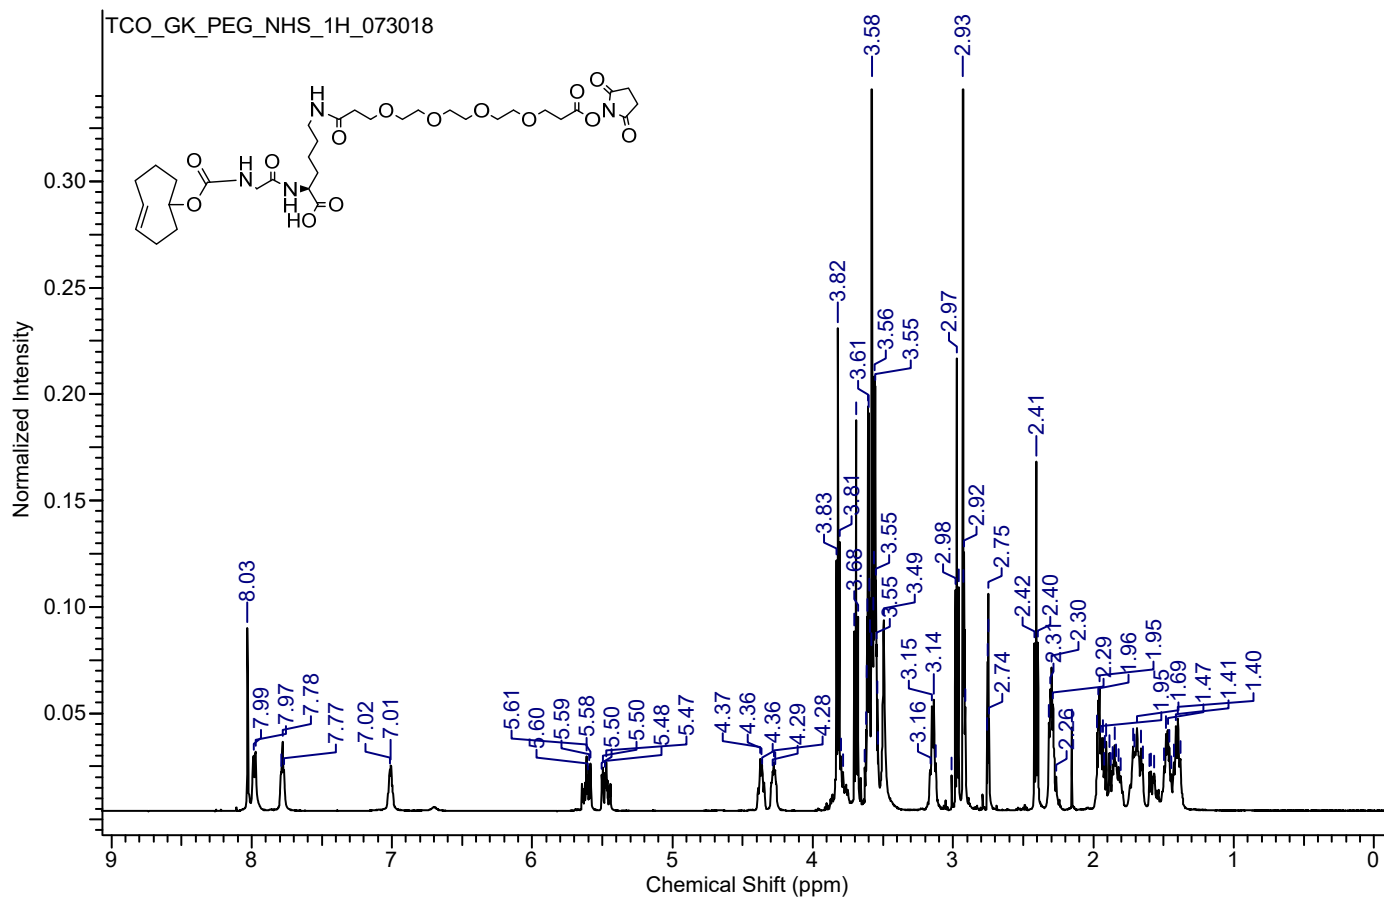

Figure S12. <sup>1</sup>H NMR spectra of compound 7

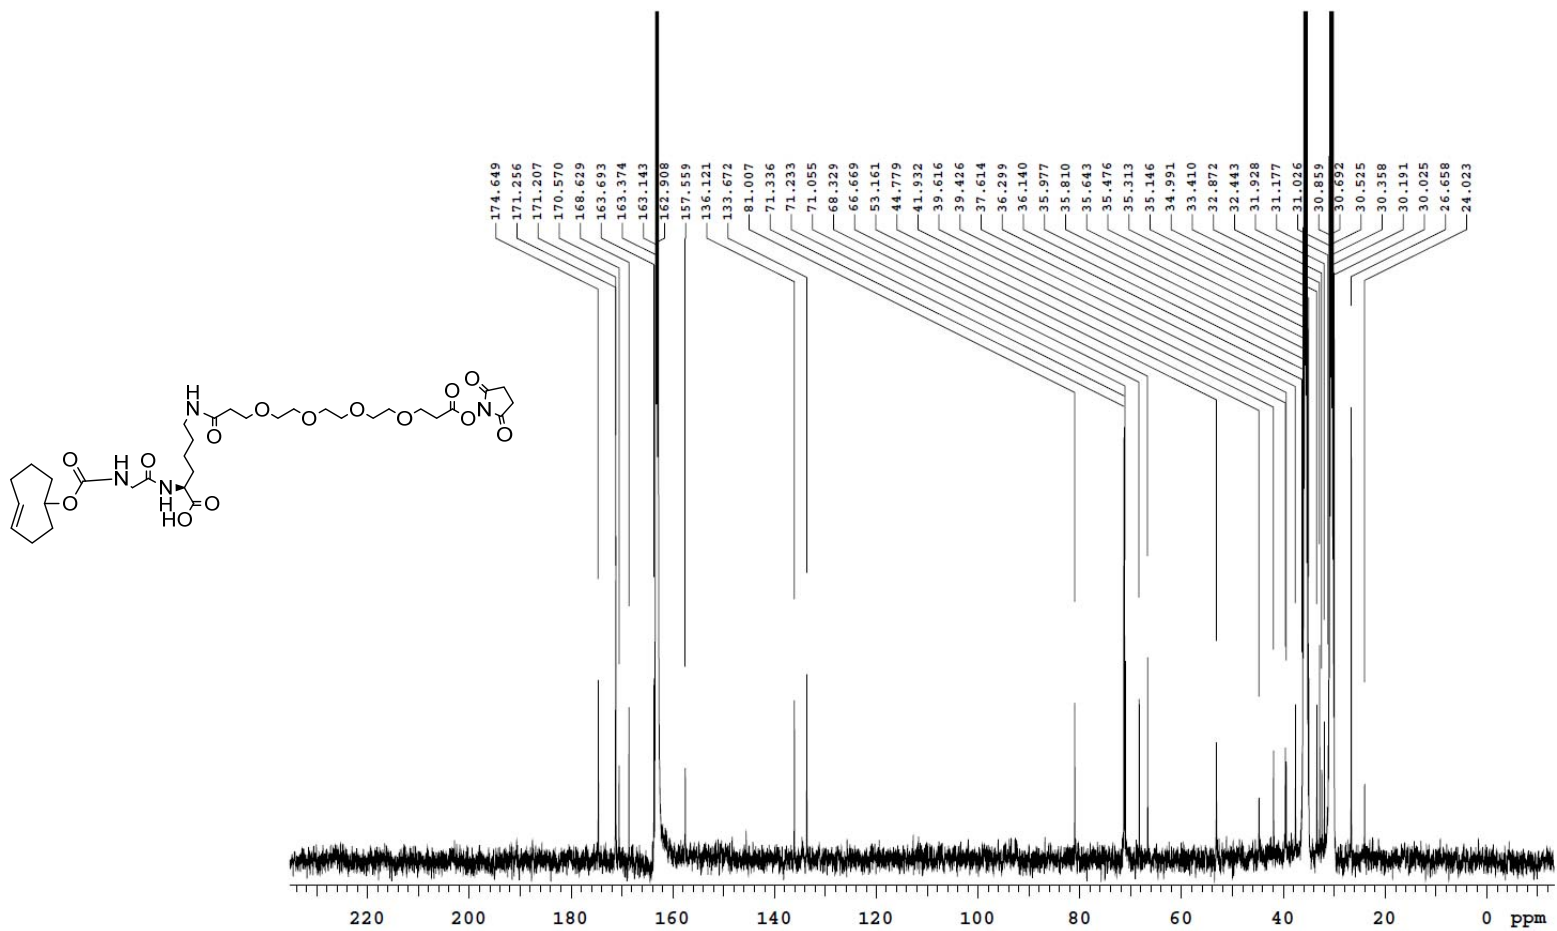

Figure S13. <sup>13</sup>C NMR spectra of compound 7

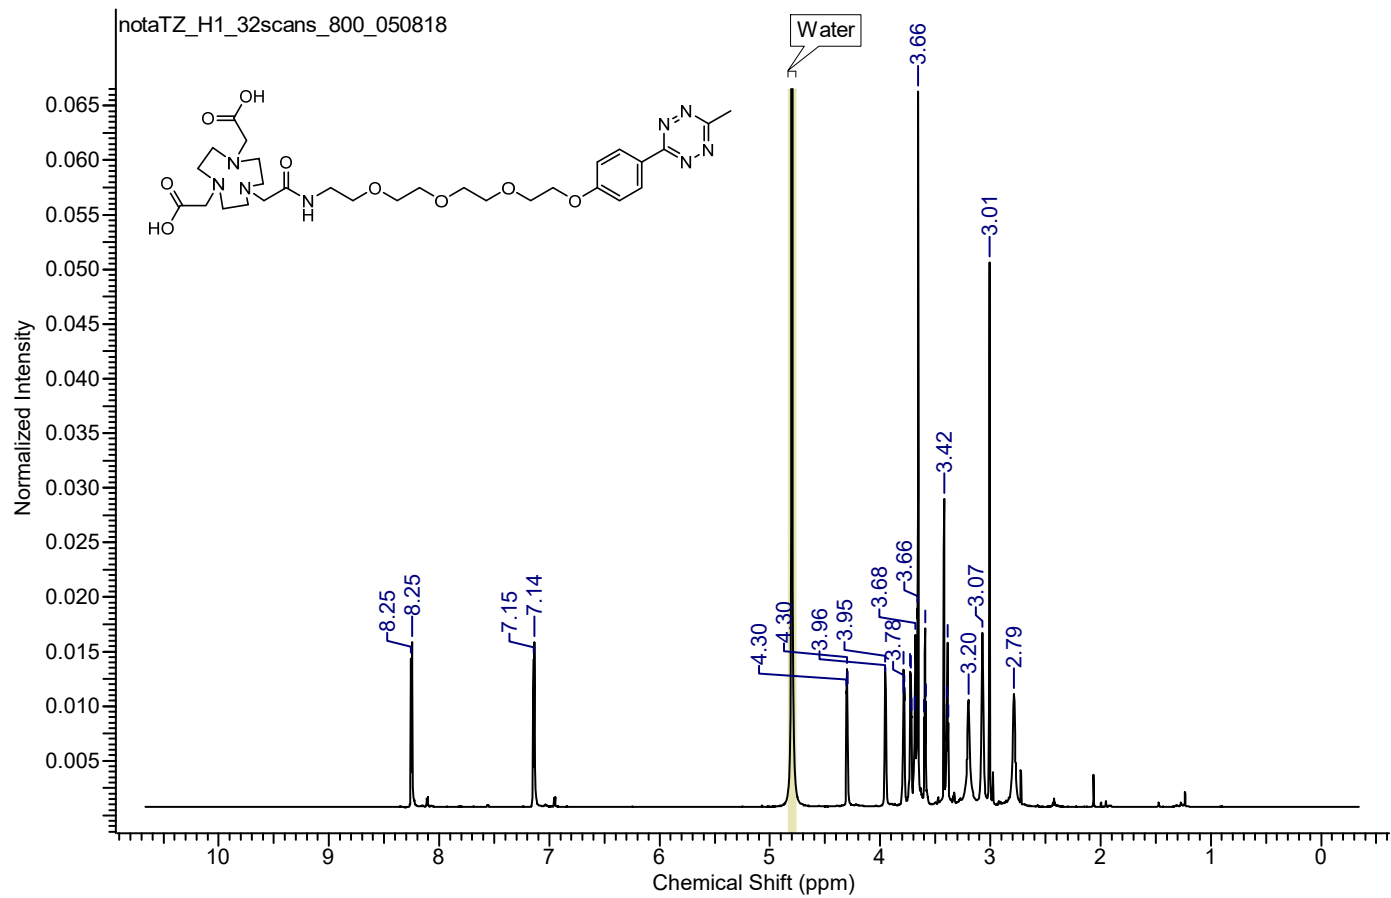

Figure S14.  $^1\text{H}$  NMR spectra of compound **10**



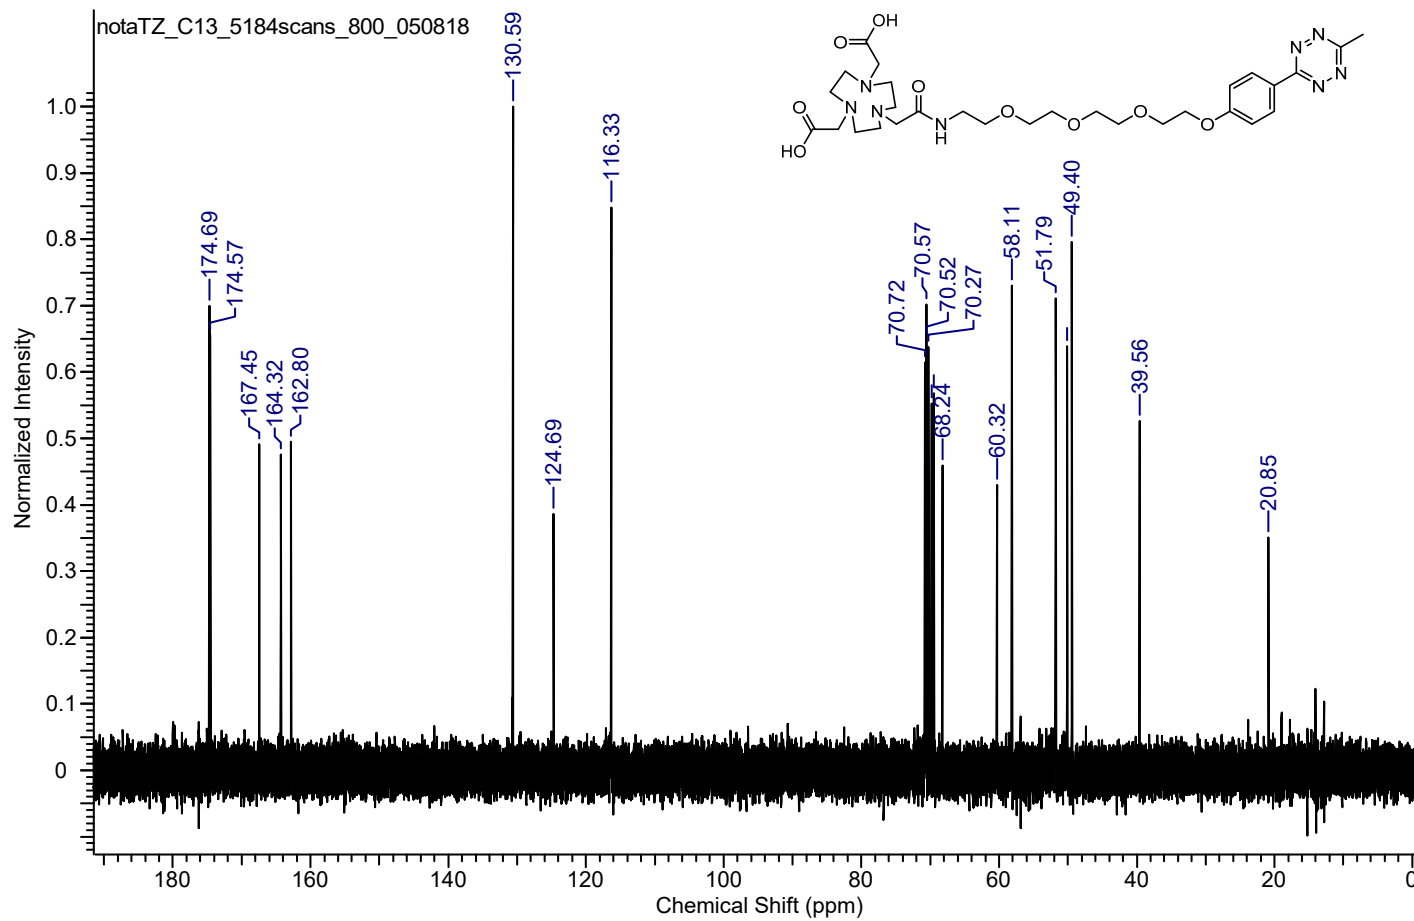

Figure S15.  $^{13}\text{C}$  NMR spectra of compound **10**
